# Supplementary material
Source: ML conference proceedings conference paper supplement (https://proceedings.neurips.cc/paper_files/paper/2022/hash/e1b248453bca182b6138b8c14a75340d-Abstract.html)
Supplement: Supplementary file 1 [file e1b248453bca182b6138b8c14a75340d-Supplemental-Conference.zip]

Archive with 1 entries (1 files):
- supplementary/appendices.pdf
